# Supplementary material
Source: PubMed Central journal article supplement (PMC3513338)
Supplement: NIHMS422956-supplement-Supplement.pdf [file NIHMS422956-supplement-Supplement.pdf]

## SUPPLEMENTARY MATERIAL

### MATERIALS AND METHODS

#### DNA sequencing

We performed amplicon sequencing of *HLA-A* exons 2, 3, and 4 of *HLA-A*, which contain the sequence variations that define (Bjorkman et al., 1987; Parham et al., 1988) in 20 unrelated EUR GV patients, on the 454 Life Science GS FLX as previously described (Bentley et al., 2009; Holcomb et al., 2011), except that the GS GType *HLA* HR primers (Roche Applied Science, Indianapolis) were used. The accompanying protocol for GS Titanium Sequencing was followed, except that 0.5 copies of DNA per bead were used and 70% of the recommended amount of DNA beads was loaded on the PicoTiter Plate™. *HLA* genotypes were assigned using Conexio Assign ATF 454 software v34 (Conexio Genomics, Perth, Australia), customized to include data from intronic sequences and International Immunogenetics Information System (<http://www.imgt.org>) 3.1.0 2010-07-16 references.

We sequenced a total 10.4 kb of the *TYR* region of chromosome 11q14.3 in 114 unrelated EUR GV patients, six of whom were among those sequenced for *HLA-A*, who were probands of multiplex GV families that also segregated other autoimmune diseases. Primers were designed using Primer3 (<http://primer3.sourceforge.net/webif.php>), amplifying 30 PCR products sized 200 to 600 bp (Supplementary Table 5), spanning all five exons: 2375 nt of 5' promoter, exon 1, through 282 nt 3'; a 332 nt internal portion of IVS1; exon 2 flanked by 70 nt 5' and 305 nt 3'; a 401 nt internal portion of IVS2; exon 3 flanked by 165 nt 5' and 229 nt 3'; exon 4 flanked by 110 nt 5' and 250 nt 3'; and exon 5 flanked by 180 nt 5' and 3242 nt 3'. For

each patient, 5 µg genomic DNA was sheared to 2-4 kb, and 1.5 µg was used for microdroplet multiplex PCR utilizing the RDT-1000 (RainDance Technologies). Amplicon DNA was purified, blunt-end concatenated, purified, sonicated, end-repaired, A-tailed, and was ligated to modified Amplicon DNA Illumina Solexa™ adapter oligonucleotides containing unique 7-nt multiplexing barcodes, resistant to two sequencing errors in the barcodes (Hamady *et al.*, 2008). Amplicon DNA fragments were then electrophoresed in 3% agarose-TBE, extracted from a band corresponding to 250-300 bp, amplified by Solexa PCR, and re-purified. Size and concentration of the resultant DNA libraries were analyzed using the Agilent Bioanalyzer DNA 7500 kit before sequencing on an Illumina Genome Analyzer Iix using 69-nt reads (Hittinger *et al.*, 2010).

### **Bioinformatic analyses**

Illumina Pipeline software produced FASTQ sequence files, which were parsed by individual using custom software capable of correcting up to two mutations per barcode. Reads were aligned to human genome build GRCh37.1/hg19 using GSNAP, ver. 2010-07-27 (Wu and Nacu, 2010). Reads that mapped to no more than 10 genomic locations were then aligned to the target sequence with the requirement that they map uniquely. Custom software converted GSNAP output to individual SNP or indel genotypes at locations with  $\geq 10X$  coverage. All variants called were submitted to SeattleSeq Annotation ([snp.gs.washington.edu/SeattleSeqAnnotation131](http://snp.gs.washington.edu/SeattleSeqAnnotation131)) and FuncPred (<http://snpinfo.niehs.nih.gov/snpfunc.htm>) to rank potential deleterious effects. PolyPhen-2 (<http://genetics.bwh.harvard.edu/pph2>) and SIFT (<http://sift.jcvi.org>) were

used to further assess non-synonymous SNPs and indels, respectively, and SKIPPY (Woolfe *et al.*, 2010) was used to assess possible effects of variants on RNA splicing. Variants 5' and 3' to the gene were screened for localization to potential regulatory elements using the ENCODE Regulation, ENC DNA methyl, TFBS Conserved, TS miRNA sites, ORegAnno, Vista Enhancers, CD34 DNaseI, and CpG Islands tracks implemented in the UCSC Genome Browser (<http://genome.ucsc.edu/cgi-bin/hgGateway>).

### **Statistical analyses**

Statistical analyses were carried out using data from the previous genomewide screen of 1392 GV cases and 2629 controls (Jin *et al.*, 2010a). We imputed SNP genotypes for a 334 kb region (chr11:88,731,228-89,065,017) spanning the *TYR* gene, from 180 kb upstream and 36 kb downstream, using MaCH (Li *et al.*, 2006), ver.1.0 (<http://www.sph.umich.edu/csg/abecasis/MACH/download/>) based on patterns of haplotype variation in the 1000 Genome Project EUR samples (Release Aug 4, 2010; <http://www.sph.umich.edu/csg/abecasis/MACH/download/1000G-2010-08.html>). We kept the imputed SNPs with  $r^2 > 0.3$  for further analyses, which included 651 SNPs with  $MAF \geq 0.01$ . We also imputed missing genotypes for the 45 genotyped SNPs in the region. Dosage data (posterior genotype probabilities) for each SNP were analyzed by logistic regression analysis implemented in PLINK (Purcell *et al.*, 2007).

To assess the joint effects of S192Y and R402Q on GV susceptibility, we used the corresponding two SNPs, rs1042602 and rs1126809, to define haplotypes and used the E-M Algorithm to estimate the most likely haplotypes for each individual. We

established the best-fit model for the two-SNP haplotypes on the basis of likelihood ratio test statistics by comparing a full model including the additive effects of each haplotype (coded 0, 1 and 2 for the number of copies of each haplotype) and dominance effects (coded 1 for possessing 1 copy of a haplotype, and otherwise 0) with a model including only the additive effects of each haplotype. The additive effect of the ancestral C-G haplotype was used as the reference and thus was not included in the model.

## REFERENCES

- Bentley G, Higuchi R, Hoglund B, *et al.* (2009) High-resolution, high-throughput HLA genotyping by next-generation sequencing. *Tiss Antigens* 74:393-404
- Bjorkman PJ, Saper MA, B. Samraoui B, *et al.* (1987) The foreign antigen binding site and T cell recognition regions of class I histocompatibility antigens. *Nature* 329:512-8
- Hamady M, Walker JJ, Harris JK, *et al.* (2008) Error-correcting barcoded primers for pyrosequencing hundreds of samples in multiplex. *Nat Methods* 5:235-7
- Hittinger CT, Gonçalves P, Sampaio JP, *et al.* (2010) Remarkably ancient balanced polymorphisms in a multi-locus gene network. *Nature* 464:54-8
- Holcomb CL, Höglund B, Anderson MW, *et al.* (2011) A multi-site study using high-resolution HLA genotyping by next generation sequencing. *Tiss Antigens*. 77:206-17
- Li Y, Willer CJ, Ding J, *et al.* (2006) MaCH: using sequence and genotype data to estimate haplotypes and unobserved genotypes. *Genet Epidemiol* 34:816-34

- Parham P, Lomen CE, Lawlor DA, *et al.* (1988) Nature of polymorphism in HLA-A, -B, and -C molecules. *Proc Natl Acad Sci USA* 85:4005-9
- Purcell S, Neale B, Todd-Brown K, *et al.* (2007) PLINK: a tool set for whole-genome association and population-based linkage analyses. *Am J Hum Genet* 81:559-75
- Woolfe A, Mullikin JC , Elnitski L (2010) Genomic features defining exonic variants that modulate splicing. *Genome Biol* 11:R20
- Wu TD, Nacu S (2010) Fast and SNP-tolerant detection of complex variants and splicing in short reads. *Bioinformatics* 26:873-81

**Supplementary Table 1. HLA-A Genotypes Observed in 20 Unrelated Generalized Vitiligo Probands Selected for rs12206499-GG**

| <b>Patient</b> | <b>HLA-A</b>       |                   | <b>rs12206499</b> |                |
|----------------|--------------------|-------------------|-------------------|----------------|
|                | <b>Allele1</b>     | <b>Allele 2</b>   | <b>Allele1</b>    | <b>Allele2</b> |
| 1              | A*02:01:01:01/02L* | A*02:01:01:01/02L | G                 | G              |
| 2              | A*02:01:01:01/02L  | A*02:01:01:01/02L | G                 | G              |
| 3              | A*02:01:01:01/02L  | A*02:01:01:01/02L | G                 | G              |
| 4              | A*02:01:01:01/02L  | A*02:01:01:01/02L | G                 | G              |
| 5              | A*02:01:01:01/02L  | A*02:01:01:01/02L | G                 | G              |
| 6              | A*02:01:01:01/02L  | A*02:20:01        | G                 | G              |
| 7              | A*02:01:01:01/02L  | A*02:01:01:01/02L | G                 | G              |
| 8              | A*02:01:01:01/02L  | A*02:01:01:01/02L | G                 | G              |
| 9              | A*02:01:01:01/02L  | A*02:01:01:01/02L | G                 | G              |
| 0              | A*02:01:01:01/02L  | A*02:01:01:01/02L | G                 | G              |
| 11             | A*02:01:01:01/02L  | A*02:01:01:01/02L | G                 | G              |
| 12             | A*02:01:01:01/02L  | A*02:01:01:01/02L | G                 | G              |
| 13             | A*02:01:01:01/02L  | A*02:01:01:01/02L | G                 | G              |
| 14             | A*02:01:01:01/02L  | A*02:01:01:01/02L | G                 | G              |
| 15             | A*02:01:01:01/02L  | A*02:01:01:01/02L | G                 | G              |
| 16             | A*02:01:01:01/02L  | A*02:01:01:01/02L | G                 | G              |
| 17             | A*02:01:01:01/02L  | A*02:01:01:01/02L | G                 | G              |
| 18             | A*02:01:01:01/02L  | A*02:01:01:01/02L | G                 | G              |
| 19             | A*02:01:01:01/02L  | A*02:01:01:01/02L | G                 | G              |
| 20             | A*02:06:01         | A*02:30           | G                 | G              |

\*The allelic typing system does not distinguish between the common *HLA-A\*02:01:01:01* allele and the very rare *HLA-A\*02:01:01:02L* allele. Although it is likely all of these are *HLA-A\*02:01:01:01*, in the text we discuss these alleles using standard 4-digit (non-synonymous changes) nomenclature, represented as *HLA-A\*02:01*.





**Supplementary Table 3. Model selection for *TYR* rs1042602-rs1126809 haplotypes**

|                 | $A_{A-A}^1$           | $A_{C-A}^1$            | $A_{A-G}^1$           | $D_{A-AD_{C-A}}^2$ | $D_{C-AD_{A-G}}^2$ | $D_{C-AD_{C-G}}^2$ | $D_{A-GD_{C-G}}^2$ | df | AIC    | Overall <i>P</i>       |
|-----------------|-----------------------|------------------------|-----------------------|--------------------|--------------------|--------------------|--------------------|----|--------|------------------------|
| <b>Model A1</b> |                       |                        |                       |                    |                    |                    |                    |    |        |                        |
| OR              | 0.32                  | 0.55                   | 0.84                  | 0.59               | 1.12               | 1.12               | 0.90               | 7  | 5120.0 |                        |
| <i>P</i>        | 0.011                 | $5.75 \times 10^{-11}$ | $3.28 \times 10^{-3}$ | 0.546              | 0.353              | 0.330              | 0.239              |    |        | $2.66 \times 10^{-15}$ |
| <b>Model A2</b> |                       |                        |                       |                    |                    |                    |                    |    |        |                        |
| OR              | 0.27                  | 0.61                   | 0.83                  |                    |                    |                    |                    | 3  | 5115.9 |                        |
| <i>P</i>        | $5.82 \times 10^{-4}$ | $2.02 \times 10^{-15}$ | $6.74 \times 10^{-4}$ |                    |                    |                    |                    |    |        | $3.76 \times 10^{-17}$ |

1, Additive effect of indicated haplotype.

2, Dominance effect of indicated diploid haplotype pair.

df, degrees of freedom; AIC, Akaike information criterion.

**Supplementary Table 4. Association of TYR Region Variants with Generalized Vitiligo**

| Marker         | nt Position | A1 | A2 | A1 FRQ | A1 OR | P        | Type      |
|----------------|-------------|----|----|--------|-------|----------|-----------|
| rs10765819     | 88731228    | A  | G  | 0.52   | 1.05  | 2.78E-01 | Genotyped |
| rs4517513      | 88732591    | C  | T  | 0.53   | 1.06  | 2.40E-01 | Imputed   |
| rs10831546     | 88732956    | C  | T  | 0.49   | 1.06  | 2.30E-01 | Imputed   |
| rs10765820     | 88734123    | G  | A  | 0.52   | 1.06  | 2.56E-01 | Imputed   |
| rs10765821     | 88734948    | T  | A  | 0.53   | 1.06  | 2.46E-01 | Imputed   |
| rs12799808     | 88736264    | C  | T  | 0.98   | 0.79  | 1.81E-01 | Imputed   |
| rs12283766     | 88739932    | G  | A  | 0.57   | 1.11  | 4.04E-02 | Imputed   |
| rs7120151      | 88740379    | G  | A  | 0.73   | 1.32  | 1.51E-05 | Imputed   |
| rs10741298     | 88740608    | G  | A  | 0.58   | 1.11  | 3.27E-02 | Imputed   |
| rs10765180     | 88740827    | G  | T  | 0.53   | 1.05  | 2.88E-01 | Imputed   |
| rs10734119     | 88740896    | G  | A  | 0.58   | 1.11  | 2.98E-02 | Imputed   |
| rs7127754      | 88741390    | C  | T  | 0.58   | 1.11  | 3.70E-02 | Imputed   |
| rs10765181     | 88742518    | G  | A  | 0.58   | 1.11  | 3.27E-02 | Imputed   |
| rs10765182     | 88742578    | C  | A  | 0.58   | 1.11  | 3.32E-02 | Imputed   |
| rs4753209      | 88743208    | A  | T  | 0.58   | 1.11  | 3.30E-02 | Imputed   |
| rs4753210      | 88743265    | G  | C  | 0.58   | 1.11  | 3.34E-02 | Imputed   |
| chr11:88743276 | 88743276    | A  | G  | 0.98   | 0.82  | 2.35E-01 | Imputed   |
| rs4753211      | 88743356    | G  | C  | 0.57   | 1.11  | 3.28E-02 | Imputed   |
| rs11604416     | 88743517    | G  | C  | 0.42   | 1.05  | 4.34E-01 | Imputed   |
| chr11:88743700 | 88743700    | A  | G  | 0.98   | 0.82  | 2.34E-01 | Imputed   |
| rs10909592     | 88743944    | A  | G  | 0.52   | 1.12  | 3.54E-02 | Imputed   |
| rs10830199     | 88744035    | G  | A  | 0.57   | 1.11  | 3.57E-02 | Imputed   |
| rs7929619      | 88744416    | G  | A  | 0.58   | 1.11  | 3.32E-02 | Genotyped |
| rs7932640      | 88744425    | C  | T  | 0.58   | 1.11  | 3.32E-02 | Imputed   |
| rs34802390     | 88745361    | G  | A  | 0.98   | 0.82  | 2.32E-01 | Imputed   |
| chr11:88745416 | 88745416    | C  | T  | 0.97   | 0.68  | 4.78E-02 | Imputed   |
| rs10830200     | 88745439    | C  | T  | 0.54   | 1.06  | 2.41E-01 | Genotyped |
| rs35716680     | 88745552    | T  | C  | 0.98   | 0.80  | 1.88E-01 | Imputed   |
| rs12420474     | 88745555    | C  | T  | 0.98   | 0.69  | 2.30E-02 | Imputed   |
| rs10765183     | 88745739    | G  | C  | 0.57   | 1.11  | 3.15E-02 | Imputed   |
| chr11:88747515 | 88747515    | C  | A  | 0.98   | 0.82  | 2.29E-01 | Imputed   |
| chr11:88747564 | 88747564    | G  | A  | 0.98   | 0.70  | 2.83E-02 | Imputed   |
| rs10501696     | 88748162    | G  | A  | 0.45   | 1.08  | 1.63E-01 | Imputed   |
| rs2226563      | 88749072    | T  | C  | 0.57   | 1.11  | 3.32E-02 | Imputed   |
| rs16912863     | 88749303    | T  | C  | 0.98   | 0.71  | 8.75E-02 | Imputed   |
| chr11:88750003 | 88750003    | A  | G  | 0.98   | 0.70  | 2.88E-02 | Imputed   |
| rs10501697     | 88750280    | C  | T  | 0.98   | 0.70  | 2.89E-02 | Imputed   |
| rs12365935     | 88751184    | A  | C  | 0.98   | 0.70  | 2.61E-02 | Imputed   |
| rs35752740     | 88751464    | C  | T  | 0.98   | 0.80  | 1.78E-01 | Imputed   |
| chr11:88751906 | 88751906    | T  | C  | 0.98   | 0.72  | 1.25E-01 | Imputed   |
| chr11:88752108 | 88752108    | A  | G  | 0.98   | 0.80  | 1.97E-01 | Imputed   |
| rs4753212      | 88752128    | T  | A  | 0.55   | 1.09  | 7.37E-02 | Imputed   |
| rs4370938      | 88752567    | C  | G  | 0.52   | 1.06  | 2.62E-01 | Imputed   |
| rs7126679      | 88753845    | C  | T  | 0.57   | 1.11  | 3.19E-02 | Imputed   |

|                |          |   |   |      |      |          |           |
|----------------|----------|---|---|------|------|----------|-----------|
| rs11018428     | 88754324 | C | T | 0.98 | 0.72 | 3.82E-02 | Imputed   |
| rs11018429     | 88754468 | G | A | 0.98 | 0.68 | 2.13E-02 | Imputed   |
| rs11018430     | 88754563 | T | C | 0.98 | 0.72 | 3.83E-02 | Imputed   |
| rs4505064      | 88755348 | A | G | 0.57 | 1.11 | 3.15E-02 | Imputed   |
| rs35516567     | 88755390 | C | A | 0.98 | 0.79 | 1.91E-01 | Imputed   |
| chr11:88756178 | 88756178 | T | C | 0.98 | 0.79 | 1.90E-01 | Imputed   |
| rs59057890     | 88756334 | C | T | 0.98 | 0.70 | 4.89E-02 | Imputed   |
| rs36006427     | 88756713 | G | A | 0.61 | 1.14 | 9.50E-03 | Imputed   |
| rs4497414      | 88756779 | T | C | 0.59 | 1.08 | 1.04E-01 | Imputed   |
| rs10430814     | 88757597 | C | T | 0.61 | 1.14 | 9.51E-03 | Imputed   |
| rs11018432     | 88757636 | T | C | 0.98 | 0.70 | 4.65E-02 | Imputed   |
| rs11018433     | 88757749 | A | G | 0.98 | 0.71 | 5.18E-02 | Imputed   |
| chr11:88757918 | 88757918 | C | T | 0.98 | 0.70 | 4.99E-02 | Imputed   |
| rs7125164      | 88757950 | C | A | 0.56 | 1.07 | 1.40E-01 | Genotyped |
| rs7121916      | 88758591 | A | G | 0.98 | 0.72 | 5.88E-02 | Imputed   |
| rs7121922      | 88758601 | A | C | 0.98 | 0.72 | 6.24E-02 | Genotyped |
| chr11:88758673 | 88758673 | G | C | 0.94 | 0.81 | 8.21E-02 | Imputed   |
| rs10430815     | 88758721 | T | G | 0.62 | 1.14 | 7.36E-03 | Imputed   |
| rs7125869      | 88759089 | T | C | 0.98 | 0.72 | 7.07E-02 | Imputed   |
| chr11:88760675 | 88760675 | T | C | 0.98 | 0.72 | 6.23E-02 | Imputed   |
| rs12224116     | 88760806 | G | A | 0.62 | 1.14 | 8.19E-03 | Imputed   |
| rs7114254      | 88760872 | G | A | 0.58 | 1.10 | 6.36E-02 | Imputed   |
| rs10830201     | 88762042 | G | A | 0.63 | 1.15 | 8.55E-03 | Imputed   |
| rs10741299     | 88762060 | C | T | 0.59 | 1.09 | 9.46E-02 | Imputed   |
| rs7108409      | 88762210 | T | C | 0.98 | 0.72 | 6.23E-02 | Imputed   |
| rs7108722      | 88762668 | A | G | 0.58 | 1.09 | 7.32E-02 | Imputed   |
| rs7122674      | 88762763 | G | A | 0.97 | 0.73 | 2.10E-02 | Imputed   |
| chr11:88763786 | 88763786 | C | T | 0.99 | 0.66 | 7.84E-02 | Imputed   |
| rs11018434     | 88765779 | A | G | 0.50 | 1.08 | 1.22E-01 | Imputed   |
| rs10830202     | 88765884 | T | C | 0.98 | 0.67 | 3.36E-02 | Imputed   |
| rs4378401      | 88766141 | T | C | 0.90 | 0.85 | 4.44E-02 | Imputed   |
| rs4611203      | 88767496 | A | G | 0.57 | 1.12 | 2.31E-02 | Imputed   |
| rs4237549      | 88768276 | A | G | 0.90 | 0.85 | 4.54E-02 | Imputed   |
| rs2212333      | 88768897 | T | A | 0.57 | 1.11 | 2.46E-02 | Imputed   |
| rs11018436     | 88769546 | C | A | 0.99 | 0.66 | 5.52E-02 | Imputed   |
| chr11:88770232 | 88770232 | G | A | 0.97 | 1.06 | 8.14E-01 | Imputed   |
| rs4275633      | 88770434 | C | T | 0.96 | 0.90 | 6.00E-01 | Imputed   |
| rs11018439     | 88775561 | T | C | 0.33 | 1.10 | 1.41E-01 | Imputed   |
| rs16924543     | 88775773 | A | C | 0.93 | 0.90 | 2.25E-01 | Genotyped |
| rs12225194     | 88776375 | C | G | 0.99 | 0.64 | 3.39E-02 | Imputed   |
| rs2226564      | 88776675 | C | T | 0.90 | 0.85 | 5.32E-02 | Imputed   |
| chr11:88777026 | 88777026 | C | G | 0.93 | 0.90 | 2.43E-01 | Imputed   |
| chr11:88777277 | 88777277 | T | A | 0.93 | 0.90 | 2.47E-01 | Imputed   |
| rs12224528     | 88779636 | C | T | 0.99 | 0.61 | 3.78E-02 | Imputed   |
| rs7931721      | 88779776 | T | C | 0.69 | 1.24 | 4.22E-05 | Genotyped |
| rs10741300     | 88780154 | T | G | 0.92 | 0.90 | 2.17E-01 | Imputed   |
| chr11:88783621 | 88783621 | G | T | 0.99 | 0.65 | 3.52E-02 | Imputed   |

|                |          |   |   |      |      |          |           |
|----------------|----------|---|---|------|------|----------|-----------|
| rs12226642     | 88784733 | C | T | 0.99 | 0.65 | 3.53E-02 | Imputed   |
| rs7115031      | 88785506 | A | G | 0.81 | 0.84 | 4.46E-03 | Imputed   |
| rs7101540      | 88785851 | T | A | 0.90 | 0.86 | 5.33E-02 | Imputed   |
| rs10830203     | 88786111 | G | A | 0.98 | 0.70 | 7.31E-02 | Imputed   |
| rs4438032      | 88786692 | G | C | 0.90 | 0.86 | 6.70E-02 | Imputed   |
| chr11:88786817 | 88786817 | A | G | 0.99 | 0.65 | 4.71E-02 | Imputed   |
| rs11018440     | 88787070 | G | A | 0.69 | 1.23 | 6.88E-05 | Imputed   |
| rs11018441     | 88787299 | G | C | 0.69 | 1.23 | 5.22E-05 | Imputed   |
| rs10830204     | 88787544 | A | G | 0.50 | 1.07 | 1.24E-01 | Genotyped |
| rs11018442     | 88787777 | A | T | 0.90 | 0.86 | 6.10E-02 | Imputed   |
| rs11018443     | 88787788 | C | A | 0.81 | 0.84 | 5.21E-03 | Imputed   |
| rs10830205     | 88788074 | G | T | 0.90 | 0.84 | 3.24E-02 | Imputed   |
| rs11018445     | 88788880 | C | G | 0.69 | 1.23 | 5.11E-05 | Imputed   |
| rs16912842     | 88789368 | C | T | 0.93 | 0.89 | 2.07E-01 | Imputed   |
| rs4592422      | 88790456 | T | C | 0.90 | 0.86 | 6.45E-02 | Imputed   |
| rs13328847     | 88790998 | A | G | 0.98 | 0.64 | 2.86E-02 | Imputed   |
| rs1892879      | 88791259 | C | A | 0.81 | 0.83 | 2.41E-03 | Genotyped |
| rs7118021      | 88791508 | G | A | 0.77 | 1.45 | 8.31E-09 | Imputed   |
| rs1942483      | 88792114 | C | T | 0.82 | 0.83 | 2.59E-03 | Imputed   |
| rs7108305      | 88792473 | A | T | 0.98 | 0.68 | 4.79E-02 | Imputed   |
| rs563012       | 88792586 | C | T | 0.93 | 0.90 | 2.58E-01 | Imputed   |
| rs4753001      | 88792601 | C | A | 0.83 | 0.85 | 1.23E-02 | Imputed   |
| rs540084       | 88792799 | A | G | 0.93 | 0.91 | 2.67E-01 | Imputed   |
| rs11018448     | 88793319 | C | A | 0.99 | 0.64 | 3.20E-02 | Imputed   |
| rs35950576     | 88793485 | T | C | 0.69 | 1.26 | 1.17E-05 | Imputed   |
| rs495695       | 88794180 | C | A | 0.91 | 0.83 | 3.20E-02 | Imputed   |
| rs4466834      | 88794824 | T | C | 0.82 | 0.83 | 2.16E-03 | Imputed   |
| chr11:88795395 | 88795395 | G | T | 0.99 | 0.64 | 3.15E-02 | Imputed   |
| chr11:88795782 | 88795782 | G | A | 0.99 | 0.64 | 3.14E-02 | Imputed   |
| chr11:88795958 | 88795958 | G | C | 0.99 | 0.63 | 3.39E-02 | Imputed   |
| chr11:88796933 | 88796933 | G | A | 0.99 | 0.64 | 3.11E-02 | Imputed   |
| chr11:88797167 | 88797167 | C | T | 0.98 | 0.69 | 6.48E-02 | Imputed   |
| rs11018449     | 88797386 | C | T | 0.69 | 1.24 | 4.36E-05 | Imputed   |
| rs8181526      | 88797521 | C | T | 0.99 | 0.64 | 3.09E-02 | Imputed   |
| chr11:88798185 | 88798185 | G | A | 0.69 | 1.26 | 1.03E-05 | Imputed   |
| rs3017240      | 88799281 | G | T | 0.90 | 0.86 | 5.22E-02 | Imputed   |
| rs12577012     | 88799517 | G | C | 0.69 | 1.24 | 3.74E-05 | Imputed   |
| rs34749698     | 88799731 | T | C | 0.76 | 1.38 | 3.59E-07 | Imputed   |
| chr11:88800094 | 88800094 | G | T | 0.99 | 0.63 | 2.91E-02 | Imputed   |
| rs485477       | 88800253 | T | C | 0.90 | 0.86 | 5.23E-02 | Imputed   |
| chr11:88800419 | 88800419 | T | C | 0.99 | 0.63 | 2.90E-02 | Imputed   |
| rs477424       | 88802281 | A | G | 0.58 | 1.11 | 2.89E-02 | Genotyped |
| rs12421020     | 88802470 | T | A | 0.99 | 0.63 | 2.90E-02 | Imputed   |
| rs11018451     | 88802593 | T | G | 0.99 | 0.63 | 2.90E-02 | Imputed   |
| rs11018452     | 88804060 | T | C | 0.99 | 0.67 | 6.61E-02 | Imputed   |
| rs7929744      | 88804684 | C | A | 0.50 | 1.08 | 1.19E-01 | Imputed   |
| rs7933118      | 88804981 | A | T | 0.93 | 0.89 | 2.02E-01 | Imputed   |

|                |          |   |   |      |      |          |           |
|----------------|----------|---|---|------|------|----------|-----------|
| rs12365909     | 88805066 | T | C | 0.69 | 1.25 | 1.68E-05 | Imputed   |
| rs12797605     | 88805228 | C | G | 0.98 | 1.07 | 7.66E-01 | Imputed   |
| chr11:88806219 | 88806219 | C | A | 0.99 | 0.62 | 3.89E-02 | Imputed   |
| rs11018454     | 88809423 | G | A | 0.99 | 0.67 | 6.60E-02 | Imputed   |
| rs11018455     | 88809554 | G | A | 0.99 | 0.67 | 6.00E-02 | Imputed   |
| rs61903387     | 88809812 | T | C | 0.43 | 1.06 | 2.75E-01 | Imputed   |
| chr11:88810147 | 88810147 | G | A | 0.99 | 0.62 | 3.96E-02 | Imputed   |
| rs12790541     | 88813292 | G | C | 0.93 | 0.91 | 3.26E-01 | Imputed   |
| chr11:88813676 | 88813676 | T | C | 0.98 | 0.71 | 5.33E-02 | Imputed   |
| rs6482998      | 88814687 | T | A | 0.93 | 0.88 | 1.95E-01 | Imputed   |
| rs7127487      | 88814870 | A | G | 0.66 | 1.16 | 3.43E-03 | Imputed   |
| rs11018458     | 88815760 | A | G | 0.69 | 1.24 | 3.94E-05 | Imputed   |
| rs10830206     | 88816137 | T | A | 0.71 | 1.15 | 1.65E-02 | Imputed   |
| rs11018459     | 88816403 | G | T | 0.99 | 0.59 | 4.07E-02 | Imputed   |
| rs4121738      | 88816538 | C | T | 0.65 | 1.16 | 3.60E-03 | Imputed   |
| rs11018462     | 88818673 | G | A | 0.99 | 0.64 | 3.33E-02 | Imputed   |
| rs11018463     | 88819742 | G | C | 0.69 | 1.23 | 5.09E-05 | Imputed   |
| chr11:88819981 | 88819981 | T | C | 0.96 | 0.91 | 5.44E-01 | Imputed   |
| rs7950833      | 88820022 | T | C | 0.98 | 0.72 | 5.36E-02 | Imputed   |
| rs10830207     | 88820601 | G | T | 0.98 | 0.72 | 5.38E-02 | Imputed   |
| rs11018464     | 88821114 | G | C | 0.69 | 1.24 | 4.96E-05 | Imputed   |
| rs11018465     | 88822199 | T | C | 0.69 | 1.18 | 2.32E-03 | Imputed   |
| chr11:88822286 | 88822286 | G | T | 0.99 | 0.65 | 1.25E-01 | Imputed   |
| rs11018466     | 88822368 | G | A | 0.67 | 1.19 | 5.70E-04 | Imputed   |
| chr11:88822958 | 88822958 | T | A | 0.98 | 0.73 | 6.93E-02 | Imputed   |
| rs9633800      | 88823096 | A | G | 0.99 | 0.64 | 3.44E-02 | Imputed   |
| rs1942490      | 88824176 | C | T | 0.67 | 1.17 | 1.73E-03 | Imputed   |
| rs11018467     | 88825663 | G | T | 0.66 | 1.16 | 3.65E-03 | Imputed   |
| rs3921012      | 88826343 | G | A | 0.68 | 1.20 | 3.76E-04 | Imputed   |
| rs11018468     | 88826626 | A | C | 0.71 | 1.28 | 7.27E-06 | Imputed   |
| rs10765184     | 88826813 | T | C | 0.66 | 1.16 | 2.92E-03 | Imputed   |
| rs59676330     | 88827132 | T | C | 0.98 | 0.72 | 5.41E-02 | Imputed   |
| rs10765185     | 88828091 | G | A | 0.93 | 0.88 | 1.70E-01 | Imputed   |
| rs10830208     | 88828356 | C | T | 0.51 | 1.08 | 1.13E-01 | Imputed   |
| rs61903389     | 88828429 | A | T | 0.35 | 1.03 | 6.43E-01 | Imputed   |
| rs11018469     | 88829395 | G | A | 0.98 | 0.72 | 5.43E-02 | Imputed   |
| chr11:88830069 | 88830069 | C | A | 0.98 | 0.85 | 4.84E-01 | Imputed   |
| rs7944714      | 88830495 | T | C | 0.68 | 1.21 | 2.68E-04 | Imputed   |
| rs7941957      | 88830751 | A | G | 0.66 | 1.16 | 3.57E-03 | Imputed   |
| rs11018471     | 88831103 | G | A | 0.68 | 1.19 | 5.99E-04 | Imputed   |
| rs10765186     | 88831337 | T | A | 0.51 | 1.08 | 1.09E-01 | Imputed   |
| rs11018472     | 88832339 | C | G | 0.98 | 0.72 | 5.45E-02 | Imputed   |
| rs11018473     | 88833108 | C | A | 0.98 | 0.72 | 5.45E-02 | Genotyped |
| rs11018474     | 88833685 | A | T | 0.98 | 0.71 | 5.09E-02 | Imputed   |
| rs34374613     | 88833832 | T | C | 0.93 | 0.91 | 3.14E-01 | Imputed   |
| rs9665831      | 88834157 | G | T | 0.66 | 1.16 | 3.55E-03 | Genotyped |
| rs9665832      | 88834258 | G | A | 0.68 | 1.23 | 8.14E-05 | Imputed   |

|                |          |   |   |      |      |          |           |
|----------------|----------|---|---|------|------|----------|-----------|
| rs11018475     | 88834293 | C | T | 0.98 | 0.71 | 4.52E-02 | Imputed   |
| rs7930291      | 88835202 | A | G | 0.98 | 0.71 | 4.52E-02 | Imputed   |
| rs7936205      | 88835427 | T | C | 0.98 | 0.71 | 4.51E-02 | Imputed   |
| rs12801693     | 88835692 | G | A | 0.93 | 0.90 | 2.91E-01 | Imputed   |
| chr11:88836023 | 88836023 | G | A | 0.98 | 0.71 | 4.44E-02 | Imputed   |
| rs4121733      | 88836328 | C | T | 0.69 | 1.23 | 8.71E-05 | Imputed   |
| rs11018477     | 88837987 | A | G | 0.98 | 0.71 | 4.68E-02 | Imputed   |
| rs7945986      | 88838798 | G | C | 0.98 | 0.71 | 4.40E-02 | Imputed   |
| rs10830209     | 88838984 | G | A | 0.51 | 1.08 | 1.04E-01 | Imputed   |
| chr11:88839606 | 88839606 | T | C | 0.98 | 0.71 | 4.26E-02 | Imputed   |
| chr11:88840594 | 88840594 | G | C | 0.99 | 0.67 | 6.27E-02 | Imputed   |
| rs11018478     | 88840872 | A | G | 0.99 | 0.67 | 6.30E-02 | Imputed   |
| rs1942496      | 88840925 | A | G | 0.51 | 1.08 | 1.01E-01 | Imputed   |
| rs10830210     | 88841257 | T | C | 0.98 | 0.71 | 4.81E-02 | Imputed   |
| rs10830211     | 88841421 | A | G | 0.98 | 0.71 | 4.20E-02 | Imputed   |
| rs1942497      | 88841459 | T | C | 0.67 | 1.20 | 3.87E-04 | Genotyped |
| rs61475088     | 88841994 | T | C | 0.98 | 0.71 | 4.19E-02 | Imputed   |
| rs12804807     | 88842024 | T | C | 0.69 | 1.23 | 7.46E-05 | Imputed   |
| rs59688726     | 88842636 | T | C | 0.98 | 0.71 | 4.20E-02 | Imputed   |
| rs7115357      | 88843515 | G | A | 0.98 | 0.71 | 4.81E-02 | Imputed   |
| rs7928253      | 88844127 | T | G | 0.98 | 0.71 | 4.22E-02 | Imputed   |
| rs7938978      | 88844224 | C | A | 0.98 | 0.71 | 4.23E-02 | Imputed   |
| rs10765187     | 88844343 | C | A | 0.67 | 1.20 | 4.80E-04 | Imputed   |
| rs11018479     | 88845435 | C | A | 0.66 | 1.16 | 3.37E-03 | Imputed   |
| rs12222165     | 88845542 | G | T | 0.67 | 1.19 | 5.90E-04 | Imputed   |
| chr11:88845698 | 88845698 | T | G | 0.99 | 0.65 | 6.77E-02 | Imputed   |
| chr11:88845892 | 88845892 | C | T | 0.51 | 1.08 | 1.02E-01 | Imputed   |
| chr11:88845920 | 88845920 | C | T | 0.67 | 1.20 | 4.68E-04 | Imputed   |
| chr11:88846298 | 88846298 | A | G | 0.99 | 0.66 | 5.92E-02 | Imputed   |
| rs59797255     | 88847020 | T | A | 0.98 | 0.71 | 4.30E-02 | Imputed   |
| rs7926601      | 88848729 | T | C | 0.98 | 0.71 | 4.32E-02 | Imputed   |
| rs7936308      | 88848731 | G | A | 0.98 | 0.71 | 4.40E-02 | Imputed   |
| rs2156123      | 88848859 | G | A | 0.66 | 1.16 | 3.54E-03 | Imputed   |
| chr11:88849315 | 88849315 | C | T | 0.94 | 1.01 | 9.30E-01 | Imputed   |
| rs7930256      | 88849434 | T | C | 0.68 | 1.21 | 2.63E-04 | Imputed   |
| chr11:88849859 | 88849859 | G | C | 0.88 | 1.80 | 1.02E-06 | Imputed   |
| chr11:88850348 | 88850348 | C | G | 0.98 | 0.71 | 4.49E-02 | Imputed   |
| rs4420272      | 88850382 | A | T | 0.67 | 1.20 | 4.91E-04 | Imputed   |
| rs10830212     | 88851105 | G | T | 0.67 | 1.19 | 5.46E-04 | Imputed   |
| rs11018481     | 88851200 | C | T | 0.99 | 0.64 | 4.41E-02 | Imputed   |
| rs7480884      | 88851967 | A | G | 0.67 | 1.19 | 4.80E-04 | Imputed   |
| rs10830214     | 88852920 | T | C | 0.99 | 0.64 | 4.34E-02 | Imputed   |
| rs34066282     | 88853407 | C | T | 0.99 | 0.64 | 4.32E-02 | Imputed   |
| chr11:88853552 | 88853552 | G | A | 0.98 | 0.71 | 4.69E-02 | Imputed   |
| rs59961091     | 88854321 | C | G | 0.98 | 0.71 | 4.70E-02 | Imputed   |
| rs10830215     | 88854535 | A | G | 0.65 | 1.15 | 4.64E-03 | Imputed   |
| rs10741302     | 88854981 | C | T | 0.93 | 0.86 | 1.12E-01 | Imputed   |

|                |          |   |   |      |      |          |           |
|----------------|----------|---|---|------|------|----------|-----------|
| chr11:88855386 | 88855386 | C | G | 0.94 | 0.85 | 9.10E-02 | Imputed   |
| rs1942484      | 88855628 | G | A | 0.67 | 1.19 | 6.22E-04 | Imputed   |
| rs12363323     | 88856292 | G | A | 0.69 | 1.23 | 8.98E-05 | Imputed   |
| chr11:88856384 | 88856384 | C | G | 0.98 | 0.71 | 4.77E-02 | Imputed   |
| rs12363640     | 88856423 | G | C | 0.68 | 1.23 | 8.81E-05 | Imputed   |
| rs1942485      | 88856444 | G | A | 0.93 | 0.86 | 1.12E-01 | Imputed   |
| rs1942486      | 88856782 | T | G | 0.69 | 1.22 | 9.54E-05 | Imputed   |
| rs7104917      | 88857081 | A | G | 0.98 | 0.71 | 4.81E-02 | Imputed   |
| rs11018483     | 88857428 | C | A | 0.98 | 0.71 | 4.83E-02 | Imputed   |
| rs11018484     | 88857653 | G | A | 0.69 | 1.22 | 1.25E-04 | Imputed   |
| rs11018485     | 88857793 | T | C | 0.99 | 0.64 | 4.60E-02 | Imputed   |
| rs10830216     | 88858397 | G | A | 0.66 | 1.15 | 5.65E-03 | Genotyped |
| rs10765188     | 88858479 | C | T | 0.93 | 0.86 | 1.12E-01 | Genotyped |
| chr11:88859112 | 88859112 | G | T | 0.98 | 0.71 | 4.83E-02 | Imputed   |
| rs1942489      | 88859485 | G | T | 0.99 | 0.68 | 8.16E-02 | Imputed   |
| rs7125167      | 88859853 | A | G | 0.98 | 0.71 | 4.43E-02 | Imputed   |
| chr11:88860440 | 88860440 | A | T | 0.98 | 0.71 | 4.41E-02 | Imputed   |
| rs4121730      | 88860739 | T | C | 0.98 | 0.70 | 4.22E-02 | Imputed   |
| rs7925346      | 88860927 | T | C | 0.66 | 1.15 | 5.70E-03 | Imputed   |
| chr11:88861387 | 88861387 | T | C | 0.98 | 0.71 | 4.35E-02 | Imputed   |
| rs11018488     | 88861590 | T | A | 0.34 | 1.05 | 4.62E-01 | Imputed   |
| rs17792911     | 88862822 | A | T | 0.68 | 1.23 | 7.88E-05 | Imputed   |
| rs4121729      | 88863140 | G | T | 0.65 | 1.15 | 5.47E-03 | Genotyped |
| rs12225438     | 88864588 | G | A | 0.99 | 0.61 | 2.88E-02 | Imputed   |
| rs12363510     | 88865114 | A | G | 0.68 | 1.23 | 8.70E-05 | Imputed   |
| rs11018490     | 88865741 | T | C | 0.98 | 0.70 | 4.26E-02 | Imputed   |
| rs56201508     | 88866026 | C | T | 0.67 | 1.19 | 6.01E-04 | Imputed   |
| rs11018491     | 88866193 | T | C | 0.98 | 0.70 | 4.24E-02 | Imputed   |
| rs11018492     | 88866539 | T | C | 0.98 | 0.70 | 4.23E-02 | Imputed   |
| rs12421072     | 88867940 | T | C | 0.99 | 0.62 | 3.29E-02 | Imputed   |
| rs11018493     | 88867979 | G | T | 0.98 | 0.70 | 4.21E-02 | Imputed   |
| rs11018494     | 88868156 | A | G | 0.98 | 0.70 | 4.03E-02 | Imputed   |
| rs11018495     | 88868174 | A | G | 0.98 | 0.70 | 4.02E-02 | Imputed   |
| rs11018496     | 88868192 | A | C | 0.98 | 0.70 | 4.03E-02 | Imputed   |
| rs11018497     | 88868510 | T | C | 0.98 | 0.70 | 4.19E-02 | Imputed   |
| rs28437494     | 88868611 | G | A | 0.65 | 1.15 | 4.85E-03 | Imputed   |
| chr11:88868752 | 88868752 | T | C | 0.94 | 0.91 | 3.82E-01 | Imputed   |
| rs10830217     | 88869323 | C | G | 0.68 | 1.23 | 9.24E-05 | Imputed   |
| rs11018499     | 88869457 | A | T | 0.98 | 0.69 | 3.93E-02 | Imputed   |
| rs12363361     | 88869948 | A | C | 0.98 | 0.69 | 3.92E-02 | Imputed   |
| rs11018503     | 88870925 | C | G | 0.98 | 0.69 | 3.90E-02 | Imputed   |
| rs7122757      | 88871075 | T | C | 0.98 | 0.69 | 3.76E-02 | Imputed   |
| rs7103137      | 88871260 | G | C | 0.68 | 1.23 | 8.70E-05 | Imputed   |
| rs7107139      | 88872014 | G | A | 0.98 | 0.67 | 2.98E-02 | Imputed   |
| rs10830218     | 88872164 | G | A | 0.69 | 1.25 | 4.18E-05 | Imputed   |
| rs10830219     | 88872509 | A | T | 0.69 | 1.25 | 4.15E-05 | Imputed   |
| rs11018505     | 88872727 | A | C | 0.98 | 0.68 | 3.11E-02 | Imputed   |

|                |          |   |   |      |      |          |           |
|----------------|----------|---|---|------|------|----------|-----------|
| rs35486674     | 88873294 | C | G | 0.68 | 1.23 | 8.89E-05 | Imputed   |
| rs11018506     | 88873421 | T | C | 0.69 | 1.23 | 1.44E-04 | Imputed   |
| rs10830220     | 88874152 | C | G | 0.52 | 1.08 | 9.80E-02 | Imputed   |
| chr11:88874754 | 88874754 | C | G | 0.94 | 0.75 | 5.64E-03 | Imputed   |
| rs7119848      | 88874854 | A | G | 0.92 | 0.83 | 3.44E-02 | Imputed   |
| rs10765189     | 88874884 | C | T | 0.68 | 1.30 | 6.66E-07 | Imputed   |
| rs4121745      | 88874930 | G | A | 0.73 | 0.71 | 1.78E-06 | Imputed   |
| rs4121744      | 88874969 | C | T | 0.53 | 1.08 | 9.32E-02 | Imputed   |
| rs7342208      | 88876845 | G | A | 0.52 | 1.08 | 9.26E-02 | Imputed   |
| rs10830221     | 88877463 | G | A | 0.53 | 1.09 | 8.12E-02 | Imputed   |
| rs11018508     | 88877686 | G | A | 0.68 | 1.30 | 4.39E-07 | Imputed   |
| rs4315072      | 88878052 | T | A | 0.53 | 1.09 | 8.85E-02 | Imputed   |
| rs1942492      | 88878204 | T | C | 0.85 | 0.77 | 4.56E-05 | Genotyped |
| rs12808722     | 88879071 | G | C | 0.94 | 0.76 | 6.20E-03 | Imputed   |
| rs11018509     | 88879205 | T | A | 0.68 | 1.29 | 6.74E-07 | Imputed   |
| rs4519092      | 88880402 | A | G | 0.53 | 1.08 | 1.27E-01 | Imputed   |
| rs12805021     | 88881929 | G | T | 0.94 | 0.76 | 5.86E-03 | Imputed   |
| rs7127310      | 88881951 | C | G | 0.85 | 0.76 | 3.38E-05 | Imputed   |
| rs10765190     | 88882425 | T | C | 0.53 | 1.08 | 9.92E-02 | Imputed   |
| rs10765191     | 88882550 | A | G | 0.53 | 1.08 | 9.50E-02 | Imputed   |
| rs10830222     | 88882962 | A | T | 0.68 | 1.29 | 7.28E-07 | Imputed   |
| rs10741304     | 88882995 | T | C | 0.92 | 0.83 | 2.34E-02 | Imputed   |
| rs11018510     | 88883499 | G | A | 0.53 | 1.08 | 1.00E-01 | Imputed   |
| rs11018511     | 88883648 | A | C | 0.54 | 1.09 | 8.91E-02 | Imputed   |
| rs10830223     | 88883885 | G | A | 0.52 | 1.08 | 9.48E-02 | Imputed   |
| rs10830224     | 88884079 | C | T | 0.54 | 1.08 | 1.01E-01 | Imputed   |
| rs10765192     | 88884329 | A | G | 0.85 | 0.76 | 2.58E-05 | Imputed   |
| rs4255542      | 88885187 | T | C | 0.54 | 1.08 | 1.05E-01 | Imputed   |
| rs4397857      | 88885480 | T | C | 0.53 | 1.08 | 9.48E-02 | Imputed   |
| rs10830225     | 88885945 | A | G | 0.54 | 1.09 | 8.29E-02 | Imputed   |
| rs4309163      | 88886767 | T | A | 0.54 | 1.08 | 9.67E-02 | Imputed   |
| rs10765193     | 88887848 | G | C | 0.73 | 1.34 | 9.29E-07 | Imputed   |
| rs11018513     | 88889350 | G | A | 0.68 | 1.29 | 7.93E-07 | Imputed   |
| rs10830226     | 88889412 | A | G | 0.91 | 0.78 | 2.00E-03 | Imputed   |
| rs12799122     | 88889765 | A | G | 0.91 | 0.77 | 1.59E-03 | Imputed   |
| rs61903411     | 88889868 | T | C | 0.59 | 1.15 | 4.43E-03 | Imputed   |
| rs35016324     | 88889886 | T | C | 0.59 | 1.15 | 4.45E-03 | Imputed   |
| rs61903412     | 88890451 | A | G | 0.54 | 1.08 | 1.15E-01 | Imputed   |
| rs10830227     | 88890822 | A | G | 0.59 | 1.15 | 4.82E-03 | Imputed   |
| rs4146871      | 88891023 | T | A | 0.92 | 0.81 | 1.42E-02 | Imputed   |
| rs10830228     | 88891114 | G | A | 0.60 | 1.15 | 4.65E-03 | Genotyped |
| rs10830229     | 88891267 | G | A | 0.91 | 0.77 | 1.78E-03 | Imputed   |
| rs4081455      | 88891543 | T | C | 0.60 | 1.15 | 4.04E-03 | Imputed   |
| rs4998767      | 88891876 | A | T | 0.60 | 1.15 | 3.16E-03 | Imputed   |
| chr11:88893001 | 88893001 | C | T | 0.74 | 1.43 | 1.32E-09 | Imputed   |
| rs10830230     | 88894537 | T | C | 0.60 | 1.15 | 3.20E-03 | Imputed   |
| rs11018515     | 88894768 | G | A | 0.60 | 1.15 | 4.05E-03 | Imputed   |

|                |          |   |   |      |      |          |           |
|----------------|----------|---|---|------|------|----------|-----------|
| rs2212751      | 88894922 | G | A | 0.59 | 1.15 | 3.28E-03 | Imputed   |
| rs12792766     | 88895059 | T | C | 0.94 | 0.75 | 4.51E-03 | Imputed   |
| rs10830231     | 88895388 | T | C | 0.60 | 1.15 | 3.16E-03 | Imputed   |
| rs61903413     | 88895962 | T | A | 0.52 | 1.18 | 2.90E-03 | Imputed   |
| rs62858761     | 88895963 | C | A | 0.52 | 1.18 | 2.89E-03 | Imputed   |
| rs7108473      | 88896425 | T | C | 0.60 | 1.15 | 2.87E-03 | Imputed   |
| rs7127661      | 88896609 | G | T | 0.60 | 1.15 | 3.45E-03 | Imputed   |
| rs7124483      | 88896664 | G | A | 0.60 | 1.15 | 3.44E-03 | Imputed   |
| rs10765194     | 88897000 | C | G | 0.68 | 1.29 | 6.80E-07 | Imputed   |
| rs10830234     | 88897444 | G | A | 0.55 | 1.09 | 6.95E-02 | Imputed   |
| rs11018518     | 88898079 | G | C | 0.69 | 1.30 | 7.50E-07 | Imputed   |
| rs7947287      | 88899362 | T | C | 0.60 | 1.15 | 3.28E-03 | Imputed   |
| rs7950415      | 88899605 | T | C | 0.54 | 1.08 | 1.16E-01 | Imputed   |
| rs1942481      | 88899728 | A | G | 0.60 | 1.15 | 3.13E-03 | Imputed   |
| rs10830236     | 88900816 | C | T | 0.69 | 1.29 | 6.84E-07 | Genotyped |
| rs10765195     | 88901170 | C | T | 0.53 | 1.08 | 1.12E-01 | Imputed   |
| rs11018519     | 88901570 | A | G | 0.53 | 1.08 | 1.11E-01 | Imputed   |
| rs10830237     | 88902144 | T | C | 0.60 | 1.15 | 3.20E-03 | Imputed   |
| rs949538       | 88902404 | G | A | 0.91 | 0.79 | 3.81E-03 | Genotyped |
| rs949539       | 88902724 | T | A | 0.60 | 1.17 | 1.64E-03 | Imputed   |
| rs949537       | 88902830 | C | T | 0.60 | 1.15 | 3.16E-03 | Imputed   |
| rs11018520     | 88903115 | T | C | 0.68 | 1.29 | 6.30E-07 | Imputed   |
| rs7934747      | 88903273 | T | C | 0.92 | 0.82 | 2.49E-02 | Imputed   |
| rs1942498      | 88903317 | A | G | 0.60 | 1.16 | 2.08E-03 | Imputed   |
| chr11:88904461 | 88904461 | A | G | 0.94 | 0.75 | 4.38E-03 | Imputed   |
| rs12421727     | 88904971 | A | T | 0.60 | 1.16 | 2.03E-03 | Imputed   |
| rs12795279     | 88905261 | T | C | 0.60 | 1.16 | 2.42E-03 | Imputed   |
| rs7949856      | 88906392 | C | G | 0.68 | 1.29 | 6.74E-07 | Imputed   |
| rs7949891      | 88907162 | A | G | 0.60 | 1.16 | 2.11E-03 | Imputed   |
| rs35537664     | 88907293 | A | C | 0.68 | 1.29 | 6.73E-07 | Imputed   |
| rs7924925      | 88907621 | A | G | 0.91 | 0.79 | 3.90E-03 | Imputed   |
| rs7925404      | 88907996 | G | A | 0.69 | 1.29 | 7.16E-07 | Imputed   |
| rs5021654      | 88910589 | G | C | 0.61 | 1.16 | 2.01E-03 | Imputed   |
| rs4547091      | 88910821 | C | T | 0.61 | 1.16 | 2.08E-03 | Imputed   |
| rs1799989      | 88910923 | C | A | 0.89 | 0.80 | 2.93E-03 | Imputed   |
| rs1042602      | 88911696 | A | C | 0.37 | 0.98 | 6.33E-01 | Genotyped |
| rs12270717     | 88912190 | T | C | 0.74 | 1.40 | 2.10E-09 | Imputed   |
| rs11820635     | 88912691 | T | C | 0.94 | 0.89 | 2.62E-01 | Genotyped |
| rs621313       | 88913663 | A | G | 0.53 | 1.08 | 8.56E-02 | Genotyped |
| rs6482999      | 88914331 | T | C | 0.62 | 1.18 | 7.61E-04 | Imputed   |
| rs11018522     | 88914415 | C | T | 0.74 | 1.39 | 5.06E-09 | Imputed   |
| rs7129973      | 88915570 | A | G | 0.61 | 1.16 | 1.89E-03 | Genotyped |
| rs35464565     | 88915611 | G | A | 0.95 | 0.75 | 8.19E-03 | Imputed   |
| rs12416719     | 88916063 | C | G | 0.89 | 0.82 | 8.41E-03 | Imputed   |
| rs34202080     | 88916646 | G | A | 0.88 | 0.80 | 1.27E-03 | Imputed   |
| rs35518533     | 88917784 | C | T | 0.88 | 0.80 | 1.27E-03 | Imputed   |
| rs12805221     | 88918084 | T | C | 0.95 | 0.75 | 8.76E-03 | Imputed   |

|                |          |   |   |      |      |          |           |
|----------------|----------|---|---|------|------|----------|-----------|
| rs12417182     | 88918514 | A | G | 0.88 | 0.80 | 1.27E-03 | Imputed   |
| rs3793976      | 88919067 | C | A | 0.88 | 0.79 | 9.56E-04 | Imputed   |
| rs11018524     | 88919816 | C | T | 0.74 | 1.38 | 5.13E-09 | Imputed   |
| rs12799137     | 88919870 | G | C | 0.89 | 0.80 | 1.69E-03 | Imputed   |
| rs11018525     | 88919905 | T | C | 0.64 | 1.21 | 1.30E-04 | Imputed   |
| rs12806466     | 88919952 | T | G | 0.90 | 0.82 | 1.04E-02 | Imputed   |
| rs12799347     | 88919969 | G | A | 0.90 | 0.82 | 1.04E-02 | Imputed   |
| rs12799349     | 88919972 | G | C | 0.90 | 0.82 | 1.04E-02 | Imputed   |
| rs12799516     | 88920016 | G | C | 0.88 | 0.80 | 1.24E-03 | Imputed   |
| chr11:88920079 | 88920079 | C | T | 0.94 | 0.89 | 2.41E-01 | Imputed   |
| rs1942493      | 88920675 | C | T | 0.88 | 0.80 | 1.24E-03 | Imputed   |
| rs58426148     | 88921059 | T | G | 0.94 | 0.89 | 2.41E-01 | Imputed   |
| chr11:88921277 | 88921277 | C | G | 0.94 | 0.89 | 2.41E-01 | Imputed   |
| rs17793678     | 88921524 | C | T | 0.74 | 1.40 | 4.41E-09 | Imputed   |
| rs594647       | 88921557 | C | T | 0.60 | 1.15 | 6.72E-03 | Imputed   |
| chr11:88921572 | 88921572 | C | A | 0.75 | 1.45 | 3.15E-10 | Imputed   |
| rs59533128     | 88921896 | G | A | 0.94 | 0.89 | 2.41E-01 | Imputed   |
| rs7117190      | 88922008 | G | T | 0.88 | 0.80 | 1.15E-03 | Genotyped |
| rs7117213      | 88922068 | G | A | 0.88 | 0.80 | 1.25E-03 | Imputed   |
| rs12418383     | 88922081 | A | T | 0.88 | 0.80 | 1.26E-03 | Imputed   |
| rs12419949     | 88922463 | G | A | 0.88 | 0.80 | 1.27E-03 | Imputed   |
| chr11:88922531 | 88922531 | A | G | 0.98 | 0.82 | 3.39E-01 | Imputed   |
| rs17793750     | 88922709 | T | C | 0.96 | 0.78 | 6.28E-02 | Imputed   |
| rs10765196     | 88925242 | G | C | 0.72 | 1.35 | 2.71E-08 | Imputed   |
| rs10765197     | 88925328 | A | C | 0.61 | 1.16 | 2.13E-03 | Imputed   |
| rs12792959     | 88925417 | A | T | 0.89 | 0.80 | 2.18E-03 | Imputed   |
| rs12420237     | 88925800 | T | C | 0.89 | 0.80 | 2.22E-03 | Imputed   |
| rs7123654      | 88925955 | T | C | 0.61 | 1.16 | 2.08E-03 | Imputed   |
| rs1939258      | 88926481 | G | A | 0.89 | 0.80 | 2.28E-03 | Genotyped |
| rs12419262     | 88927408 | C | A | 0.89 | 0.80 | 2.05E-03 | Imputed   |
| rs12420674     | 88927499 | A | G | 0.89 | 0.80 | 2.05E-03 | Imputed   |
| chr11:88927587 | 88927587 | C | T | 0.98 | 0.46 | 1.77E-03 | Imputed   |
| rs12419341     | 88928132 | C | T | 0.89 | 0.80 | 1.78E-03 | Imputed   |
| chr11:88928148 | 88928148 | G | A | 0.94 | 0.81 | 4.48E-02 | Imputed   |
| rs12419364     | 88928354 | C | T | 0.89 | 0.80 | 2.07E-03 | Imputed   |
| rs35801536     | 88928390 | A | T | 0.94 | 0.78 | 1.22E-02 | Imputed   |
| chr11:88928406 | 88928406 | C | T | 0.95 | 0.91 | 4.01E-01 | Imputed   |
| rs1432447      | 88928905 | A | G | 0.92 | 0.82 | 2.64E-02 | Genotyped |
| rs12419071     | 88929153 | A | T | 0.90 | 0.83 | 1.37E-02 | Imputed   |
| rs12420348     | 88929278 | G | A | 0.89 | 0.80 | 2.27E-03 | Imputed   |
| rs12808283     | 88929485 | A | T | 0.89 | 0.80 | 2.16E-03 | Imputed   |
| rs12807810     | 88929624 | C | T | 0.89 | 0.80 | 2.50E-03 | Genotyped |
| rs12789834     | 88929631 | T | C | 0.95 | 0.77 | 1.39E-02 | Imputed   |
| rs12808785     | 88930106 | C | T | 0.89 | 0.80 | 2.78E-03 | Imputed   |
| rs11018528     | 88930377 | A | G | 0.72 | 1.35 | 2.67E-08 | Genotyped |
| rs12791412     | 88930581 | A | G | 0.72 | 1.35 | 2.67E-08 | Imputed   |
| rs7925468      | 88930900 | G | A | 0.89 | 0.80 | 2.05E-03 | Imputed   |

|                |          |   |   |      |      |          |           |
|----------------|----------|---|---|------|------|----------|-----------|
| rs7929991      | 88931636 | C | T | 0.89 | 0.80 | 2.33E-03 | Genotyped |
| rs12804213     | 88931984 | T | G | 0.90 | 0.78 | 2.34E-03 | Imputed   |
| rs12421505     | 88932104 | G | C | 0.89 | 0.80 | 2.49E-03 | Imputed   |
| rs12420864     | 88932390 | T | C | 0.90 | 0.83 | 1.39E-02 | Imputed   |
| rs574028       | 88933250 | C | T | 0.53 | 1.09 | 7.74E-02 | Imputed   |
| rs11018530     | 88933629 | C | G | 0.89 | 0.80 | 2.35E-03 | Imputed   |
| rs7105390      | 88934334 | T | C | 0.89 | 0.80 | 2.54E-03 | Imputed   |
| chr11:88935031 | 88935031 | C | T | 0.95 | 0.88 | 2.31E-01 | Imputed   |
| rs12421402     | 88935032 | A | G | 0.89 | 0.80 | 2.16E-03 | Genotyped |
| rs12417166     | 88935096 | G | T | 0.89 | 0.80 | 2.53E-03 | Imputed   |
| chr11:88935188 | 88935188 | G | A | 0.95 | 0.74 | 7.43E-02 | Imputed   |
| rs12799768     | 88935820 | G | C | 0.89 | 0.80 | 2.48E-03 | Imputed   |
| rs2000554      | 88935941 | T | C | 0.61 | 1.16 | 1.99E-03 | Imputed   |
| rs2000553      | 88936007 | T | C | 0.61 | 1.17 | 1.35E-03 | Imputed   |
| rs12098971     | 88936133 | G | A | 0.88 | 0.81 | 1.84E-03 | Imputed   |
| rs10830238     | 88936512 | G | A | 0.61 | 1.16 | 2.00E-03 | Imputed   |
| chr11:88937516 | 88937516 | G | A | 0.88 | 0.81 | 1.87E-03 | Imputed   |
| rs10830239     | 88937602 | T | C | 0.54 | 1.09 | 5.61E-02 | Imputed   |
| chr11:88937636 | 88937636 | A | G | 0.88 | 0.81 | 1.86E-03 | Imputed   |
| rs11018532     | 88938018 | T | G | 0.88 | 0.80 | 1.80E-03 | Imputed   |
| rs10830240     | 88938356 | A | G | 0.73 | 1.38 | 7.89E-09 | Imputed   |
| rs4290229      | 88938471 | T | C | 0.88 | 0.80 | 1.63E-03 | Imputed   |
| rs4399330      | 88938571 | A | T | 0.88 | 0.80 | 1.54E-03 | Imputed   |
| rs12286618     | 88938933 | G | C | 0.74 | 1.39 | 3.70E-09 | Imputed   |
| rs7945829      | 88938979 | C | T | 0.88 | 0.80 | 1.77E-03 | Imputed   |
| rs12280693     | 88939008 | A | G | 0.61 | 1.16 | 2.11E-03 | Imputed   |
| rs57639254     | 88939047 | A | T | 0.89 | 0.80 | 2.27E-03 | Imputed   |
| rs12807511     | 88940226 | C | A | 0.89 | 0.80 | 2.27E-03 | Imputed   |
| rs35434176     | 88940460 | A | C | 0.88 | 0.80 | 1.76E-03 | Imputed   |
| rs7925659      | 88941174 | C | T | 0.88 | 0.80 | 1.64E-03 | Imputed   |
| rs7924913      | 88941264 | G | A | 0.90 | 0.78 | 1.13E-03 | Imputed   |
| rs35905469     | 88941836 | G | C | 0.98 | 0.80 | 2.64E-01 | Imputed   |
| rs35300336     | 88941950 | G | A | 0.88 | 0.80 | 1.74E-03 | Imputed   |
| rs12421397     | 88942018 | G | A | 0.88 | 0.80 | 1.74E-03 | Imputed   |
| rs10830241     | 88942313 | T | C | 0.61 | 1.16 | 2.18E-03 | Imputed   |
| rs35457014     | 88942803 | G | A | 0.89 | 0.79 | 1.69E-03 | Imputed   |
| chr11:88943035 | 88943035 | T | C | 0.76 | 1.45 | 1.29E-09 | Imputed   |
| rs11018534     | 88943630 | G | A | 0.74 | 1.38 | 9.62E-09 | Imputed   |
| rs61138184     | 88943818 | C | A | 0.91 | 0.84 | 4.22E-02 | Imputed   |
| chr11:88944367 | 88944367 | A | G | 0.88 | 0.80 | 1.68E-03 | Imputed   |
| rs12417026     | 88944751 | G | A | 0.89 | 0.80 | 2.30E-03 | Imputed   |
| rs12417077     | 88945118 | G | A | 0.88 | 0.80 | 1.43E-03 | Imputed   |
| rs9736253      | 88945586 | C | T | 0.88 | 0.80 | 1.43E-03 | Imputed   |
| rs34175287     | 88945920 | G | A | 0.88 | 0.80 | 1.42E-03 | Imputed   |
| rs7116589      | 88946742 | T | C | 0.88 | 0.80 | 2.41E-03 | Imputed   |
| rs12418178     | 88947924 | G | T | 0.88 | 0.80 | 1.42E-03 | Imputed   |
| rs7117973      | 88948006 | A | T | 0.88 | 0.80 | 1.63E-03 | Imputed   |

|                |          |   |   |      |      |          |           |
|----------------|----------|---|---|------|------|----------|-----------|
| rs11828731     | 88948621 | G | A | 0.88 | 0.81 | 2.25E-03 | Imputed   |
| rs12808381     | 88949104 | C | T | 0.88 | 0.80 | 1.62E-03 | Imputed   |
| rs12421155     | 88949549 | A | G | 0.88 | 0.80 | 1.35E-03 | Imputed   |
| rs7117255      | 88949729 | G | C | 0.88 | 0.80 | 1.35E-03 | Imputed   |
| rs7123206      | 88951332 | C | T | 0.88 | 0.80 | 1.60E-03 | Imputed   |
| rs7115568      | 88951878 | T | C | 0.88 | 0.80 | 1.60E-03 | Imputed   |
| rs7112373      | 88952032 | A | G | 0.88 | 0.80 | 1.61E-03 | Imputed   |
| rs34661861     | 88952253 | C | T | 0.88 | 0.80 | 1.52E-03 | Imputed   |
| rs11018535     | 88952347 | T | C | 0.92 | 0.82 | 2.52E-02 | Imputed   |
| rs16912259     | 88952419 | T | C | 0.88 | 0.80 | 1.59E-03 | Imputed   |
| rs12786274     | 88952456 | C | T | 0.88 | 0.80 | 1.59E-03 | Imputed   |
| rs34857319     | 88952916 | C | T | 0.88 | 0.80 | 1.49E-03 | Imputed   |
| rs11018536     | 88953846 | T | C | 0.75 | 1.39 | 9.92E-09 | Imputed   |
| rs6483000      | 88953990 | T | C | 0.88 | 0.80 | 1.35E-03 | Imputed   |
| rs6483001      | 88954197 | A | C | 0.88 | 0.80 | 1.40E-03 | Imputed   |
| rs6483002      | 88954339 | C | T | 0.88 | 0.80 | 1.34E-03 | Imputed   |
| rs7108676      | 88955005 | G | T | 0.88 | 0.80 | 1.39E-03 | Imputed   |
| rs6483003      | 88955147 | T | A | 0.89 | 0.81 | 3.02E-03 | Imputed   |
| rs6483004      | 88955234 | C | T | 0.88 | 0.80 | 1.39E-03 | Imputed   |
| rs7934646      | 88955676 | G | A | 0.88 | 0.80 | 1.34E-03 | Imputed   |
| rs34469199     | 88956493 | A | G | 0.88 | 0.80 | 1.33E-03 | Imputed   |
| rs17191474     | 88957047 | G | A | 0.94 | 0.77 | 9.72E-03 | Genotyped |
| rs11824837     | 88957190 | G | A | 0.88 | 0.80 | 1.32E-03 | Imputed   |
| rs11820797     | 88957385 | C | T | 0.88 | 0.80 | 1.30E-03 | Imputed   |
| rs6483006      | 88957961 | A | G | 0.88 | 0.80 | 1.39E-03 | Imputed   |
| rs28625370     | 88959289 | G | A | 0.88 | 0.80 | 1.30E-03 | Imputed   |
| rs12803764     | 88959428 | T | C | 0.89 | 0.79 | 1.53E-03 | Imputed   |
| rs12803765     | 88959432 | T | C | 0.89 | 0.79 | 1.53E-03 | Imputed   |
| rs11018541     | 88960147 | G | A | 0.62 | 1.16 | 2.54E-03 | Genotyped |
| rs12804012     | 88960790 | G | A | 0.88 | 0.79 | 7.39E-04 | Imputed   |
| rs3793975      | 88961188 | G | A | 0.88 | 0.80 | 1.50E-03 | Genotyped |
| rs3793974      | 88961521 | A | T | 0.88 | 0.80 | 1.26E-03 | Imputed   |
| rs11018542     | 88962090 | C | T | 0.92 | 0.82 | 2.48E-02 | Genotyped |
| rs7941532      | 88962579 | G | T | 0.88 | 0.80 | 1.26E-03 | Imputed   |
| rs12793071     | 88962605 | G | A | 0.94 | 0.77 | 9.61E-03 | Imputed   |
| rs12795158     | 88962931 | C | G | 0.88 | 0.79 | 1.14E-03 | Imputed   |
| rs12795171     | 88962954 | C | T | 0.88 | 0.79 | 1.14E-03 | Imputed   |
| rs11018543     | 88962962 | C | T | 0.92 | 0.82 | 2.47E-02 | Imputed   |
| chr11:88963132 | 88963132 | C | G | 0.94 | 0.84 | 5.56E-02 | Imputed   |
| rs35105852     | 88963353 | T | C | 0.88 | 0.79 | 1.19E-03 | Imputed   |
| rs7935604      | 88963619 | T | C | 0.88 | 0.80 | 1.19E-03 | Imputed   |
| chr11:88964199 | 88964199 | G | C | 0.88 | 0.80 | 2.08E-03 | Imputed   |
| rs12808354     | 88964262 | T | C | 0.89 | 0.79 | 1.56E-03 | Imputed   |
| rs4418813      | 88965926 | T | C | 0.70 | 1.33 | 2.32E-07 | Imputed   |
| rs4512823      | 88966584 | A | G | 0.70 | 1.32 | 2.66E-07 | Imputed   |
| rs4429061      | 88966648 | C | T | 0.70 | 1.32 | 2.81E-07 | Imputed   |
| rs1074304      | 88966798 | C | T | 0.71 | 1.33 | 3.15E-07 | Imputed   |

|                |          |   |   |      |      |          |           |
|----------------|----------|---|---|------|------|----------|-----------|
| rs1074303      | 88966821 | T | C | 0.71 | 1.33 | 3.16E-07 | Imputed   |
| rs4512825      | 88966851 | A | C | 0.71 | 1.33 | 3.18E-07 | Imputed   |
| rs2155149      | 88967990 | T | C | 0.61 | 1.15 | 3.91E-03 | Imputed   |
| rs4753214      | 88969066 | C | T | 0.53 | 1.08 | 1.03E-01 | Imputed   |
| rs10765198     | 88969774 | T | C | 0.73 | 1.36 | 2.50E-08 | Genotyped |
| rs11018544     | 88970006 | A | T | 0.53 | 1.08 | 1.04E-01 | Imputed   |
| rs7358418      | 88970138 | T | G | 0.73 | 1.32 | 2.94E-07 | Imputed   |
| rs7939929      | 88971035 | A | G | 0.73 | 1.32 | 5.00E-07 | Imputed   |
| rs12365043     | 88971134 | G | A | 0.74 | 1.38 | 9.71E-09 | Imputed   |
| rs11018545     | 88971269 | C | T | 0.74 | 1.39 | 1.28E-08 | Imputed   |
| rs7940368      | 88971373 | A | G | 0.73 | 1.32 | 2.72E-07 | Imputed   |
| rs34486762     | 88971478 | G | C | 0.94 | 0.76 | 6.68E-03 | Imputed   |
| rs10765199     | 88971638 | T | A | 0.76 | 1.38 | 3.07E-07 | Imputed   |
| rs10765200     | 88971684 | C | T | 0.74 | 1.35 | 1.44E-07 | Imputed   |
| rs10765201     | 88971704 | G | C | 0.73 | 1.33 | 3.86E-07 | Imputed   |
| rs35937494     | 88971820 | C | G | 0.94 | 0.76 | 6.70E-03 | Imputed   |
| rs7358330      | 88972118 | C | A | 0.73 | 1.38 | 9.00E-09 | Imputed   |
| rs6415994      | 88972346 | C | T | 0.73 | 1.34 | 1.06E-07 | Imputed   |
| rs1939262      | 88972562 | G | A | 0.73 | 1.35 | 6.16E-08 | Imputed   |
| rs1939263      | 88972956 | A | C | 0.62 | 1.16 | 3.09E-03 | Imputed   |
| rs7933594      | 88973201 | C | T | 0.73 | 1.34 | 1.03E-07 | Imputed   |
| rs11018546     | 88973361 | G | A | 0.73 | 1.38 | 5.15E-09 | Imputed   |
| rs2866556      | 88973610 | A | G | 0.89 | 0.79 | 1.41E-03 | Imputed   |
| rs10830243     | 88974707 | A | G | 0.61 | 1.15 | 4.25E-03 | Imputed   |
| rs2000555      | 88975107 | C | T | 0.62 | 1.16 | 3.23E-03 | Imputed   |
| rs3936992      | 88975416 | T | C | 0.61 | 1.15 | 4.02E-03 | Imputed   |
| chr11:88975475 | 88975475 | A | C | 0.96 | 0.71 | 5.59E-03 | Imputed   |
| rs7934212      | 88975667 | T | C | 0.63 | 1.17 | 2.33E-03 | Imputed   |
| rs4396293      | 88976113 | T | C | 0.62 | 1.17 | 1.71E-03 | Imputed   |
| rs12295166     | 88976157 | T | C | 0.62 | 1.00 | 9.39E-01 | Imputed   |
| rs2186640      | 88976163 | C | G | 0.62 | 1.17 | 1.71E-03 | Imputed   |
| rs2155148      | 88976283 | G | A | 0.62 | 1.17 | 1.70E-03 | Imputed   |
| rs10830244     | 88976933 | T | C | 0.67 | 1.20 | 1.46E-03 | Imputed   |
| rs12288824     | 88977169 | C | T | 0.62 | 1.17 | 2.21E-03 | Imputed   |
| rs10501698     | 88977364 | G | A | 0.75 | 1.41 | 6.41E-09 | Imputed   |
| rs11018549     | 88977433 | A | C | 0.65 | 1.16 | 5.08E-03 | Imputed   |
| rs10830245     | 88977461 | C | G | 0.66 | 1.19 | 1.55E-03 | Imputed   |
| rs10830246     | 88977497 | C | T | 0.70 | 1.19 | 4.08E-03 | Imputed   |
| rs10830247     | 88977515 | T | C | 0.70 | 1.20 | 2.69E-03 | Imputed   |
| rs10830248     | 88977572 | C | T | 0.64 | 1.16 | 5.80E-03 | Imputed   |
| rs10830249     | 88977586 | C | A | 0.64 | 1.15 | 6.85E-03 | Imputed   |
| rs10830250     | 88977607 | C | G | 0.64 | 1.20 | 5.96E-04 | Imputed   |
| chr11:88977676 | 88977676 | A | C | 0.96 | 0.66 | 3.15E-03 | Imputed   |
| rs7924589      | 88978308 | G | A | 0.63 | 1.20 | 2.72E-04 | Imputed   |
| rs4601783      | 88978545 | A | G | 0.54 | 1.11 | 3.42E-02 | Imputed   |
| chr11:88978627 | 88978627 | T | C | 0.95 | 0.84 | 1.32E-01 | Imputed   |
| rs17174064     | 88979491 | T | C | 0.93 | 0.78 | 1.22E-02 | Imputed   |

|                |          |   |   |      |      |          |           |
|----------------|----------|---|---|------|------|----------|-----------|
| rs4121401      | 88979846 | T | C | 0.64 | 1.28 | 1.47E-06 | Imputed   |
| chr11:88979955 | 88979955 | T | C | 0.95 | 0.80 | 3.89E-02 | Imputed   |
| rs7117826      | 88980260 | G | A | 0.94 | 0.80 | 3.01E-02 | Imputed   |
| rs7936840      | 88981503 | T | C | 0.97 | 0.81 | 9.94E-02 | Imputed   |
| rs10741305     | 88982718 | T | C | 0.52 | 1.15 | 2.79E-03 | Imputed   |
| rs35963892     | 88983003 | T | C | 0.97 | 0.81 | 9.90E-02 | Imputed   |
| rs34003066     | 88983632 | C | T | 0.97 | 0.81 | 9.85E-02 | Imputed   |
| rs12421746     | 88984984 | C | T | 0.97 | 0.81 | 9.82E-02 | Genotyped |
| chr11:88985354 | 88985354 | G | T | 0.97 | 0.79 | 1.41E-01 | Imputed   |
| rs34947445     | 88985940 | C | T | 0.91 | 0.78 | 3.76E-03 | Imputed   |
| rs12808219     | 88986019 | A | C | 0.98 | 0.81 | 2.49E-01 | Imputed   |
| chr11:88987541 | 88987541 | C | T | 0.94 | 0.81 | 4.70E-02 | Imputed   |
| chr11:88987580 | 88987580 | G | C | 0.94 | 0.82 | 6.19E-02 | Imputed   |
| rs11018555     | 88987673 | G | T | 0.39 | 0.83 | 1.56E-04 | Imputed   |
| rs3936623      | 88990049 | T | C | 0.89 | 0.75 | 4.53E-04 | Imputed   |
| chr11:88990380 | 88990380 | G | A | 0.97 | 0.79 | 9.73E-02 | Imputed   |
| chr11:88990643 | 88990643 | T | C | 0.95 | 0.82 | 6.02E-02 | Imputed   |
| rs11828655     | 88990786 | C | T | 0.97 | 0.79 | 9.75E-02 | Imputed   |
| rs35029283     | 88990974 | C | T | 0.97 | 0.79 | 9.57E-02 | Imputed   |
| rs12420278     | 88993648 | G | A | 0.97 | 0.79 | 9.88E-02 | Imputed   |
| chr11:88996152 | 88996152 | G | C | 0.97 | 0.79 | 9.89E-02 | Imputed   |
| chr11:88996779 | 88996779 | C | T | 0.98 | 0.50 | 1.69E-03 | Imputed   |
| rs7127196      | 88997520 | A | C | 0.97 | 0.82 | 1.04E-01 | Imputed   |
| rs58429491     | 88997896 | A | C | 0.94 | 0.85 | 1.12E-01 | Imputed   |
| chr11:88998400 | 88998400 | T | G | 0.97 | 0.82 | 1.12E-01 | Imputed   |
| rs6483008      | 88999996 | A | T | 0.97 | 0.78 | 1.19E-01 | Imputed   |
| rs4087499      | 89001126 | G | C | 0.71 | 1.42 | 6.98E-11 | Imputed   |
| rs7927996      | 89001621 | G | T | 0.97 | 0.81 | 1.01E-01 | Imputed   |
| rs591260       | 89002566 | A | C | 0.53 | 1.15 | 3.05E-03 | Imputed   |
| rs2298458      | 89003604 | C | A | 0.97 | 0.81 | 1.02E-01 | Genotyped |
| rs34739346     | 89003953 | A | G | 0.99 | 0.75 | 2.17E-01 | Imputed   |
| rs645592       | 89004894 | T | C | 0.53 | 1.15 | 2.72E-03 | Imputed   |
| chr11:89005089 | 89005089 | A | C | 0.98 | 0.87 | 4.69E-01 | Imputed   |
| rs1847134      | 89005253 | A | C | 0.71 | 1.42 | 7.00E-11 | Genotyped |
| chr11:89006917 | 89006917 | A | G | 0.91 | 0.81 | 1.25E-02 | Imputed   |
| chr11:89007019 | 89007019 | T | C | 0.91 | 0.81 | 1.25E-02 | Imputed   |
| rs12421030     | 89007579 | C | T | 0.92 | 0.80 | 1.13E-02 | Imputed   |
| rs7101897      | 89007922 | C | T | 0.71 | 1.42 | 6.02E-11 | Imputed   |
| rs12574987     | 89008008 | G | A | 0.97 | 0.78 | 1.03E-01 | Imputed   |
| rs12419351     | 89008816 | C | G | 0.93 | 0.77 | 7.07E-03 | Imputed   |
| rs12416958     | 89010200 | G | A | 0.98 | 0.75 | 1.75E-01 | Imputed   |
| rs58893107     | 89010668 | C | G | 0.94 | 0.82 | 3.53E-02 | Imputed   |
| rs1393350      | 89011046 | G | A | 0.76 | 1.54 | 1.21E-13 | Genotyped |
| rs1939255      | 89012085 | C | T | 0.94 | 0.82 | 3.36E-02 | Genotyped |
| chr11:89012215 | 89012215 | A | G | 0.98 | 0.81 | 2.47E-01 | Imputed   |
| chr11:89012398 | 89012398 | C | T | 0.94 | 0.82 | 3.37E-02 | Imputed   |
| chr11:89012983 | 89012983 | T | C | 0.98 | 0.81 | 2.47E-01 | Imputed   |

|                |          |   |   |      |      |          |           |
|----------------|----------|---|---|------|------|----------|-----------|
| rs11018559     | 89013386 | G | A | 0.92 | 0.79 | 9.51E-03 | Imputed   |
| chr11:89013797 | 89013797 | T | C | 0.91 | 0.80 | 1.05E-02 | Imputed   |
| chr11:89013806 | 89013806 | T | C | 0.98 | 0.81 | 2.47E-01 | Imputed   |
| rs12273884     | 89014355 | T | C | 0.63 | 1.27 | 8.40E-07 | Imputed   |
| rs11018560     | 89016625 | C | A | 0.92 | 0.80 | 1.15E-02 | Imputed   |
| rs1126809      | 89017961 | A | G | 0.26 | 0.64 | 1.37E-14 | Imputed   |
| rs1827430      | 89018440 | A | G | 0.63 | 1.28 | 6.80E-07 | Imputed   |
| chr11:89018458 | 89018458 | T | C | 0.96 | 0.67 | 2.63E-02 | Imputed   |
| chr11:89018710 | 89018710 | T | A | 0.98 | 0.81 | 2.47E-01 | Imputed   |
| rs34373463     | 89019374 | A | G | 0.98 | 0.77 | 1.25E-01 | Imputed   |
| chr11:89019719 | 89019719 | C | T | 0.94 | 0.81 | 3.04E-02 | Imputed   |
| rs598769       | 89019737 | C | T | 0.54 | 1.18 | 4.99E-04 | Imputed   |
| rs16913104     | 89020498 | T | C | 0.94 | 0.82 | 3.43E-02 | Imputed   |
| rs9919559      | 89020590 | T | C | 0.63 | 1.27 | 8.73E-07 | Imputed   |
| rs3900053      | 89021065 | T | C | 0.71 | 1.46 | 5.41E-12 | Imputed   |
| rs1847142      | 89021574 | G | A | 0.71 | 1.47 | 5.23E-12 | Imputed   |
| chr11:89022127 | 89022127 | A | G | 0.98 | 0.82 | 2.86E-01 | Imputed   |
| rs12363772     | 89022446 | G | A | 0.71 | 1.46 | 6.00E-12 | Imputed   |
| rs16913107     | 89023060 | T | C | 0.94 | 0.82 | 3.51E-02 | Genotyped |
| rs2002720      | 89023533 | G | A | 0.99 | 0.76 | 2.12E-01 | Imputed   |
| chr11:89023577 | 89023577 | G | A | 0.98 | 0.82 | 2.86E-01 | Imputed   |
| rs877072       | 89023840 | G | A | 0.91 | 0.81 | 1.28E-02 | Imputed   |
| rs4542415      | 89023892 | C | T | 0.96 | 0.77 | 2.90E-02 | Imputed   |
| rs4121403      | 89024455 | A | G | 0.71 | 1.46 | 5.93E-12 | Imputed   |
| chr11:89025838 | 89025838 | T | A | 0.94 | 0.82 | 3.57E-02 | Imputed   |
| rs7947262      | 89026407 | T | A | 0.64 | 1.30 | 2.29E-07 | Imputed   |
| rs7929045      | 89026617 | G | T | 0.94 | 0.82 | 3.58E-02 | Imputed   |
| rs34899701     | 89026670 | A | G | 0.98 | 0.82 | 2.86E-01 | Imputed   |
| rs10830253     | 89028043 | T | G | 0.71 | 1.46 | 4.40E-12 | Imputed   |
| rs28521275     | 89028969 | C | T | 0.54 | 1.18 | 5.29E-04 | Imputed   |
| rs56295826     | 89029304 | C | T | 0.98 | 0.77 | 1.91E-01 | Imputed   |
| rs4121404      | 89029931 | T | C | 0.54 | 1.19 | 3.17E-04 | Imputed   |
| chr11:89030364 | 89030364 | T | C | 0.95 | 0.77 | 2.69E-02 | Imputed   |
| rs7951935      | 89030399 | G | T | 0.65 | 1.32 | 2.37E-08 | Imputed   |
| chr11:89030491 | 89030491 | G | A | 0.95 | 0.80 | 4.22E-02 | Imputed   |
| rs7924538      | 89030529 | C | A | 0.65 | 1.32 | 3.19E-08 | Imputed   |
| chr11:89032699 | 89032699 | T | C | 0.95 | 0.83 | 6.75E-02 | Imputed   |
| rs1954771      | 89033227 | G | A | 0.55 | 1.19 | 2.41E-04 | Imputed   |
| rs1954772      | 89033269 | C | T | 0.71 | 1.46 | 4.19E-12 | Imputed   |
| rs16913119     | 89033483 | A | C | 0.95 | 0.81 | 3.74E-02 | Imputed   |
| chr11:89033801 | 89033801 | C | T | 0.95 | 0.81 | 3.74E-02 | Imputed   |
| chr11:89034197 | 89034197 | G | C | 0.95 | 0.81 | 3.76E-02 | Imputed   |
| rs11018564     | 89035134 | T | C | 0.64 | 1.28 | 4.75E-07 | Imputed   |
| rs57347863     | 89035476 | C | T | 0.71 | 1.44 | 1.84E-11 | Imputed   |
| rs1502259      | 89036245 | G | T | 0.56 | 1.20 | 8.93E-05 | Genotyped |
| rs1847140      | 89037064 | A | G | 0.70 | 1.44 | 1.47E-11 | Imputed   |
| chr11:89037297 | 89037297 | C | T | 0.99 | 0.76 | 2.49E-01 | Imputed   |

|                |          |   |   |      |      |          |           |
|----------------|----------|---|---|------|------|----------|-----------|
| rs1806319      | 89037936 | T | C | 0.65 | 1.32 | 3.32E-08 | Genotyped |
| rs11018566     | 89040226 | G | A | 0.97 | 0.80 | 1.39E-01 | Imputed   |
| rs10830254     | 89040251 | A | G | 0.67 | 1.33 | 7.99E-08 | Imputed   |
| rs4106039      | 89041143 | A | C | 0.98 | 0.79 | 2.25E-01 | Imputed   |
| rs35399452     | 89041701 | G | T | 0.98 | 0.78 | 2.22E-01 | Imputed   |
| rs11018567     | 89042883 | A | C | 0.68 | 1.35 | 7.11E-08 | Imputed   |
| chr11:89043171 | 89043171 | C | T | 0.98 | 0.78 | 2.15E-01 | Imputed   |
| rs7112446      | 89043474 | G | C | 0.76 | 1.37 | 5.11E-06 | Imputed   |
| rs7129117      | 89043557 | A | G | 0.59 | 1.21 | 3.99E-04 | Imputed   |
| rs7129131      | 89043574 | A | C | 0.60 | 1.20 | 7.98E-04 | Imputed   |
| rs3907665      | 89043946 | A | G | 0.67 | 1.34 | 1.36E-07 | Imputed   |
| rs12788372     | 89044441 | G | A | 0.98 | 0.77 | 2.01E-01 | Imputed   |
| rs10830255     | 89044525 | A | C | 0.67 | 1.34 | 1.34E-07 | Imputed   |
| rs11018569     | 89044911 | A | G | 0.66 | 1.31 | 8.63E-07 | Imputed   |
| rs655108       | 89045079 | T | G | 0.53 | 1.20 | 3.64E-04 | Imputed   |
| chr11:89045165 | 89045165 | C | T | 0.94 | 0.81 | 6.82E-02 | Imputed   |
| rs10830256     | 89045556 | G | T | 0.55 | 1.22 | 7.36E-05 | Imputed   |
| rs34993346     | 89046097 | A | G | 0.72 | 1.51 | 1.44E-11 | Imputed   |
| rs10830259     | 89052162 | G | C | 0.90 | 1.23 | 1.14E-01 | Imputed   |
| rs12576761     | 89052255 | C | G | 0.73 | 1.51 | 1.57E-11 | Imputed   |
| chr11:89053002 | 89053002 | A | T | 0.98 | 0.76 | 1.88E-01 | Imputed   |
| rs34177771     | 89053190 | G | A | 0.98 | 0.76 | 1.87E-01 | Imputed   |
| rs7950615      | 89053302 | G | A | 0.73 | 1.54 | 6.20E-12 | Imputed   |
| rs7943603      | 89053387 | T | C | 0.67 | 1.35 | 6.60E-08 | Imputed   |
| rs11018573     | 89053879 | A | C | 0.94 | 0.82 | 7.94E-02 | Imputed   |
| rs1967203      | 89055293 | A | G | 0.55 | 1.21 | 1.92E-04 | Imputed   |
| rs7101579      | 89056614 | A | G | 0.67 | 1.35 | 5.30E-08 | Imputed   |
| rs3750923      | 89057130 | T | G | 0.67 | 1.36 | 7.20E-08 | Imputed   |
| rs3829229      | 89057348 | G | A | 0.73 | 1.54 | 5.86E-12 | Imputed   |
| rs11018578     | 89058101 | T | C | 0.72 | 1.51 | 1.90E-11 | Imputed   |
| rs28517716     | 89060002 | G | A | 0.96 | 0.81 | 1.46E-01 | Imputed   |
| rs10501701     | 89060635 | A | T | 0.95 | 0.82 | 8.79E-02 | Imputed   |
| rs11018581     | 89061622 | C | T | 0.83 | 0.81 | 3.95E-03 | Imputed   |
| rs11018582     | 89061647 | G | A | 0.88 | 0.83 | 2.79E-02 | Imputed   |
| chr11:89061858 | 89061858 | G | A | 0.88 | 0.82 | 2.48E-02 | Imputed   |
| chr11:89061878 | 89061878 | T | C | 0.95 | 0.81 | 9.01E-02 | Imputed   |
| chr11:89061988 | 89061988 | T | C | 0.95 | 0.81 | 8.94E-02 | Imputed   |
| rs3897708      | 89062444 | C | T | 0.83 | 0.81 | 5.38E-03 | Imputed   |
| chr11:89063384 | 89063384 | G | T | 0.98 | 0.72 | 1.48E-01 | Imputed   |
| chr11:89063913 | 89063913 | A | G | 0.96 | 0.79 | 1.16E-01 | Imputed   |
| rs11821838     | 89065017 | C | T | 0.94 | 0.87 | 1.62E-01 | Genotyped |

A1, allele 1; A2, allele 2; A1 FRQ, allele 1 frequency; A1 OR, allele 1 odds ratio.

**Supplementary Table 5. Amplicons and PCR Primers used in *TYR* Sequencing**

| <b>Chr</b> | <b>Amplicon start</b> | <b>Amplicon end</b> | <b>Forward primer sequence</b> | <b>Reverse primer sequence</b> |
|------------|-----------------------|---------------------|--------------------------------|--------------------------------|
| 11         | 88908244              | 88908761            | CTTGAAATGTCACTTCTCCC           | CTACACGTGTTGTAGTCTTC           |
| 11         | 88908642              | 88909141            | CCCACAACCTGAAGATACCTA          | GCCACAAAGAGATTAACACA           |
| 11         | 88908983              | 88909568            | GCAAGTGTAAGGCAAAATTC           | TAGTCAAATCAAAGTTGCC            |
| 11         | 88909122              | 88909711            | TGTGTTAATCTCTTTGTGGC           | TCATCTATCAAGTTGGAGCA           |
| 11         | 88909549              | 88909990            | GGGCAACTTTGATTTGACTA           | ATAGTGAGCTAGGGAAACTG           |
| 11         | 88909872              | 88910461            | GCCCACAATAACATCTCTTC           | CTTTGATAACTGGGCGATTT           |
| 11         | 88910155              | 88910620            | ACAATATGGCTACAGCATTG           | ATGCAGAGAGAGATTGTCTT           |
| 11         | 88910465              | 88910961            | GCTATCCTTAGGAGTTGTCA           | TTTCATCCTCTGAAAAGCAC           |
| 11         | 88910746              | 88911221            | TTTGCAAGGTCAAATCATCA           | CCTTCTCCATCAGGTTCTTA           |
| 11         | 88911062              | 88911602            | AGAGAAATCTGTGACTCCAA           | TTTTCATTTGGCCATAGGTC           |
| 11         | 88911202              | 88911796            | TAAGAACCTGATGGAGAAGG           | CAGCTTCTGGATTTCTTGTT           |
| 11         | 88911664              | 88912222            | TTATGTGTCAATGGATGCAC           | AAGGCACCATACTATGTTCT           |
| 11         | 88921529              | 88921860            | GTTTGAAAAGCAGCAACAAT           | ATATTCAGCCTTACCCACTT           |
| 11         | 88924300              | 88924891            | AACATTTCTGCCTTCTCCTA           | CAGTGACACAATCATAGCTC           |
| 11         | 88930598              | 88930998            | TGTTAGCTGTCATCACCATA           | CTAGGACAAAAACAAGGACC           |
| 11         | 88960825              | 88961367            | CACTGGGTATCCAGAATGTA           | TTTGTATCCTGCCTAATCCA           |
| 11         | 89017830              | 89018372            | TCTTTCCATGTCTCCAGATT           | TGATTCTACTGCTCTTCACA           |
| 11         | 89028130              | 89028586            | ATGAAGAAACTGAGGCTTTG           | TTGAGTTAGAGTGAGGTCAG           |
| 11         | 89028222              | 89028791            | TACTCCAAAGGACTGTGAAA           | GTTCCCTCATTACCAAATAGCA         |
| 11         | 89028720              | 89029131            | CACTCAGCCCTTTAACATT            | AGCTGGATGTGTTATAGACG           |
| 11         | 89029043              | 89029468            | AGAACCTTTAGCTCTTTCCT           | TAActTCTTCCCACTGATCC           |
| 11         | 89029308              | 89029777            | TCCATTTTCCTCGCCTATTA           | GCTGAAAGAAAGAATGGTGA           |
| 11         | 89029456              | 89030039            | TGGGAAGAAGTTATAGTGGG           | GTGTCTCGTCTTAActTACCT          |
| 11         | 89029758              | 89030323            | TCACCATTCTTTCTTTCAGC           | CAAATGTGTGGTTAGGACA            |
| 11         | 89030020              | 89030605            | AGGTAGTTAAGACGAGACAC           | GCTGGTTATGTAActGAGTTG          |
| 11         | 89030488              | 89030981            | ACTGACTGCAGGAAAATCTA           | CTCCCTCTCAGTAACAATGA           |
| 11         | 89030739              | 89031269            | TCTGAAGAAGGAATAACGGT           | GCAGAAGCATAAAAATGAAGC          |
| 11         | 89031132              | 89031615            | TGGTTTTCTCAATATGGCAC           | AAACAAGCTCACAATAGGTG           |
| 11         | 89031250              | 89031827            | GCTTCATTTTATGCTTCTGC           | GGTGAACAATTTGAAAGCTC           |
| 11         | 89031596              | 89032148            | CACCTATTGTGAGCTTGTTT           | TGTTGGTAACATGTCGATTG           |
